# Supplementary material
Source: publisher figshare collection journal article supplement (https://karger.figshare.com/ndownloader/files/40910444)
Supplement: Supplementary file 1 [file 40910444]

**Supplementary table 1**. **The correlation between the density of Tryptase positive cells and variables**

| **Variables** | **Spearman’ rho** | ***P*** | **Variable** | **Spearman’**  **rho** | ***P*** |
| --- | --- | --- | --- | --- | --- |
| Male (%) | 0.184 | 0.111 | Serum creatinine (μmol/L) | 0.465 | <0.001 |
| Age (years) | -0.095 | 0.423 | eGFR (ml/min 1.73 m2) | -0.392 | <0.001 |
| SBP (mmHg) | 0.265 | 0.023 | Mesangial hypercellularity(M) | 0.224 | 0.052 |
| DBP (mmHg) | 0.244 | 0.037 | Endocapillary hypercellularity(E) | -0.141 | 0.724 |
| Hematuria ≥3+ (%) | -0.148 | 0.213 | Segmental glomerulosclerosis(S) | 0.106 | 0.363 |
| Proteinuria (g/24h) | 0.309 | 0.027 | Interstitial fibrosis(T) | 0.447 | <0.001 |
| Blood sugar (mmol/l) | -0.093 | 0.095 | Crescents(C) | 0.120 | 0.301 |
| Blood cholesterol (mmol/l) | 0.044 | 0.732 | Arterial wall thickening score | 0.235 | 0.041 |
| Blood triglyceride (mmol/l) | 0.010 | 0.957 | Arterial hyalinosis score | -0.054 | 0.643 |
| Serum albumin (g/L) | -0.024 | 0.850 | CD68 positive cells/HPF | 0.436 | 0.029 |
| Serum uric acid (μmol/L) | 0.319 | 0.007 | CD8 positive cells/HPF | 0.497 | <0.001 |
| Blood urea nitrogen (mmol/L) | 0.319 | 0.008 | CD45RO positive cells/HPF | 0.609 | <0.001 |

SBP, systolic blood pressure; DBP, diastolic blood pressure.

The severity of erythrocyturia was characterized as follows: 3 ≤ RBC ≤ 5 /HPF was deﬁned as 1+; 5 ˂ RBC ≤ 20/HPF as 2+; 20 ˂ RBC ≤ 50 RBC/HPF as 3+; and >50 RBC/HPF as 4+.

eGFR, estimated glomerular filtration rate; eGFR (ml/min per1.73 m2) = 186×Scr-1.154×age-0.203×0.742 (if female) ×1.227

Pathologic features were scored using the Oxford classification.
